# Supplementary material
Source: PubMed Central journal article supplement (PMC2720641)

# Differential Sensitivity and Mechanism of Inhibition of COX-2 Oxygenation of Arachidonic Acid and 2-Arachidonoylglycerol by Ibuprofen and Mefenamic Acid

Jeffery J. Prusakiewicz, Kelsey C. Duggan, Carol A. Rouzer, and Lawrence J. Marnett\*

Departments of Biochemistry, Chemistry, and Pharmacology, Vanderbilt Institute of Chemical Biology, Center in Molecular Toxicology, Vanderbilt-Ingram Cancer Center, Vanderbilt University School of Medicine, Nashville TN, 37232-0146

## Supporting Information

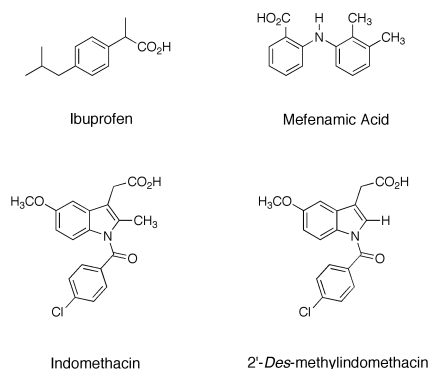

**Figure 1. Inhibition of mCOX-2 Oxygenation of AA and 2-AG by Mefenamic Acid.** Mefenamate and substrate were mixed in an oxygraph cell and the reaction initiated by addition of mCOX-2. The initial velocity of O<sub>2</sub> uptake was determined from a tangent to the most rapidly descending portion of the curve. A) Instantaneous COX-2 inhibition of AA metabolism by mefenamic acid at 0 μM (■), 20 μM (▼), 40 μM (▲), and 50 μM (□). B) Instantaneous COX-2 inhibition of 2-AG metabolism by mefenamic acid at 0 μM (■), 0.1 μM (●), 0.2 μM (▲), 0.3 μM (▼), and 0.4 μM (◆).

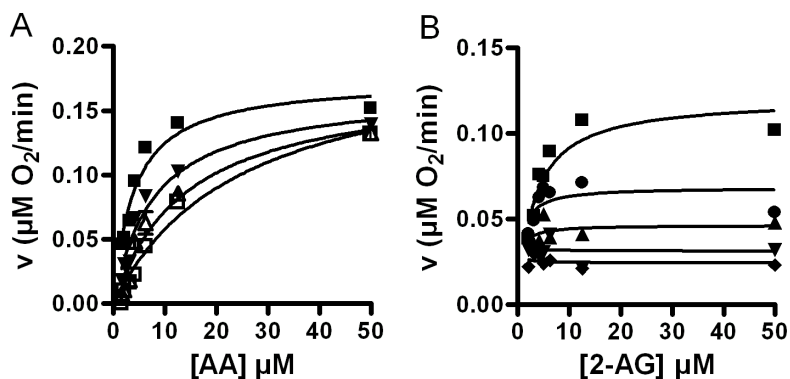

**Figure 2. Determination of  $K_I$  for Ibuprofen and Mefenamic Acid Inhibition of mCOX-2**

**Oxygenation of AA.** Secondary plots of  $K_m^{app}$  vs  $[I]$  were used to determine the  $K_I$  (-x-intercept) for inhibition of mCOX-2 AA oxygenation by A) Ibuprofen, and B) Mefenamic Acid.

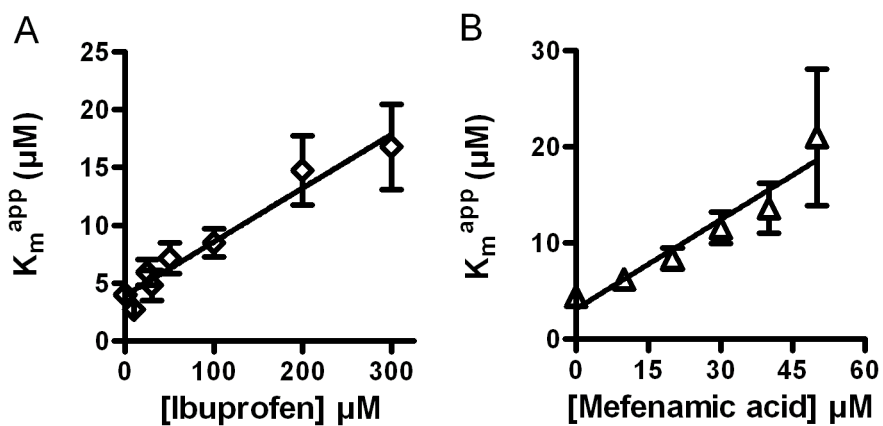

**Figure 3. Determination of  $K_I$  for Ibuprofen Inhibition of mCOX-2 Oxygenation of 2-AG.** Secondary plots of  $1/V_{max}^{app}$  vs  $[I]$  were used to determine the  $K_I$  (-x-intercept) for inhibition of mCOX-2 2-AG oxygenation by ibuprofen.

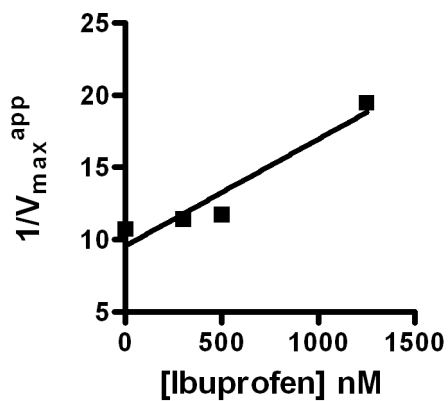

**Figure 4. Fluorescence Quenching Titration of mCOX-2 with Mefenamic Acid.** A) The quenching of mCOX-2 intrinsic protein fluorescence by mefenamic acid was monitored in a fluorescence cuvette at 37° C. Data are the average of at least two independent determinations. Mefenamic acid exhibited a  $K_d^{app}$  of  $32 \pm 2$  nM towards mCOX-2 (100 nM), which was calculated from non-linear regression of the sigmoidal dose-response curve with a variable slope. B) Secondary plot of  $K_d^{app}$  dependence on protein concentration. The y-axis intercept is equal to the  $K_d$  (4 nM) for mefenamic acid binding to mCOX-2.

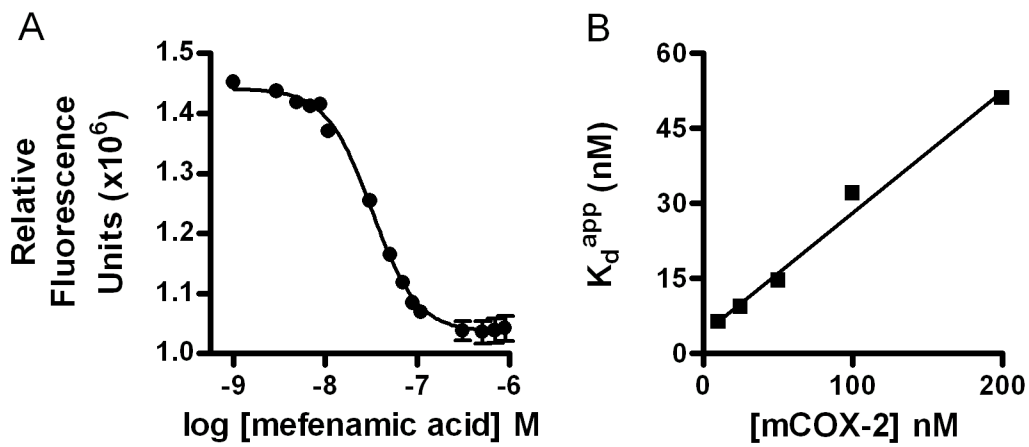

Supplement: bi900999z_si_001.pdf [file bi900999z_si_001.pdf]
